# Supplementary material for: Alumina-coated silicon-based nanowire arrays for high quality Li-ion battery anodes
Source: Royal Society of Chemistry journal article supplement (doi:10.1039/c2jm35125k), 2012-01-01
Supplement: c2jm35125k.pdf [file c2jm35125k.pdf]

## Electronic Supplementary Information (ESI)

### Alumina-Coated Silicon-Based Nanowire Arrays for High Quality Li-Ion Battery Anodes

Hung Tran Nguyen<sup>1,2</sup>, Mihai Robert Zamfir<sup>1</sup>, Loc Dinh Duong<sup>1</sup>, Young Hee Lee<sup>1</sup>,

Paolo Bondavalli<sup>3</sup> and Didier Pribat<sup>1\*</sup>

<sup>1</sup> Department of Energy Science, Sungkyunkwan University, Suwon, 440-746, Republic of Korea.

<sup>2</sup> Institute of Chemistry & Materials Science, 17 Hoang Sam, Ha Noi, Viet Nam.

<sup>3</sup> Nanocarb Laboratory, Thales Research & Technology, Palaiseau 91767, France.

(\*) [didier53@skku.edu](mailto:didier53@skku.edu)

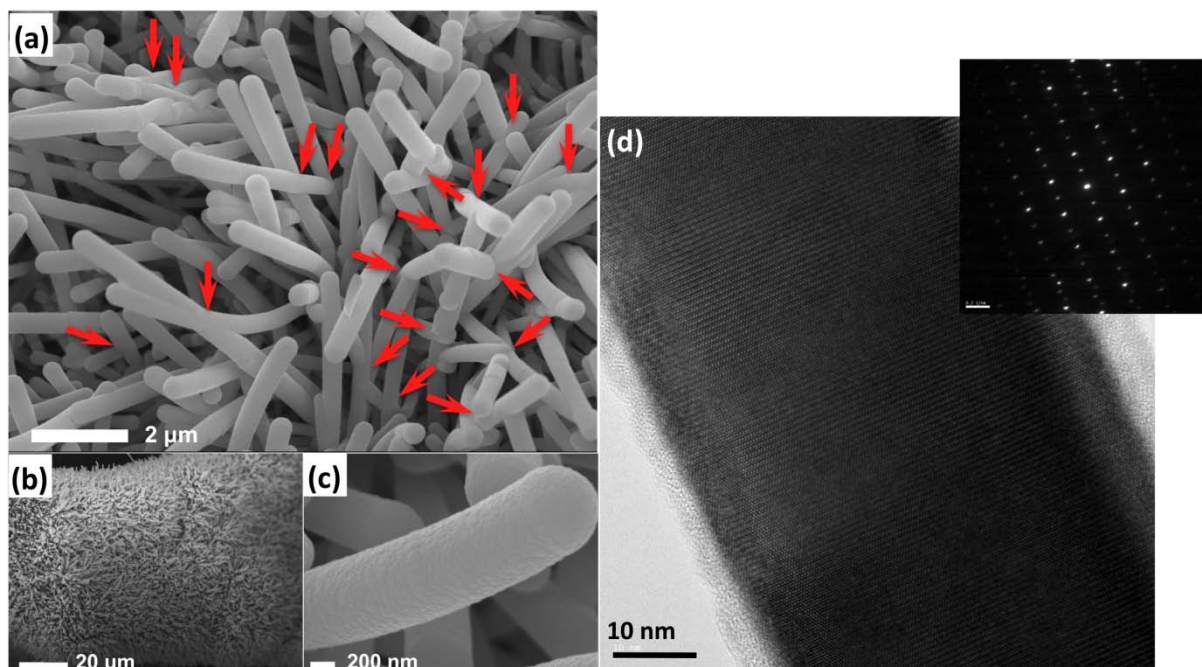

**Figure S1.** Electron microscope pictures showing details of the  $\text{Al}_2\text{O}_3$ -coated core-shell  $\text{NiSi}_x$ -aSi anode before testing. (a): SEM picture where the arrows point some of the interconnections between NWs. (b): Low magnification SEM view of a Ni foam branch covered with core-shell NW structures. (c): detail of one NW. (d): TEM picture of a core NiSi NW showing its high crystalline quality. Note the  $\sim 5$  nm-thick amorphous layer at the surface of the NW. The inset is an electron diffraction pattern showing no trace of twinning or any other crystal defect.

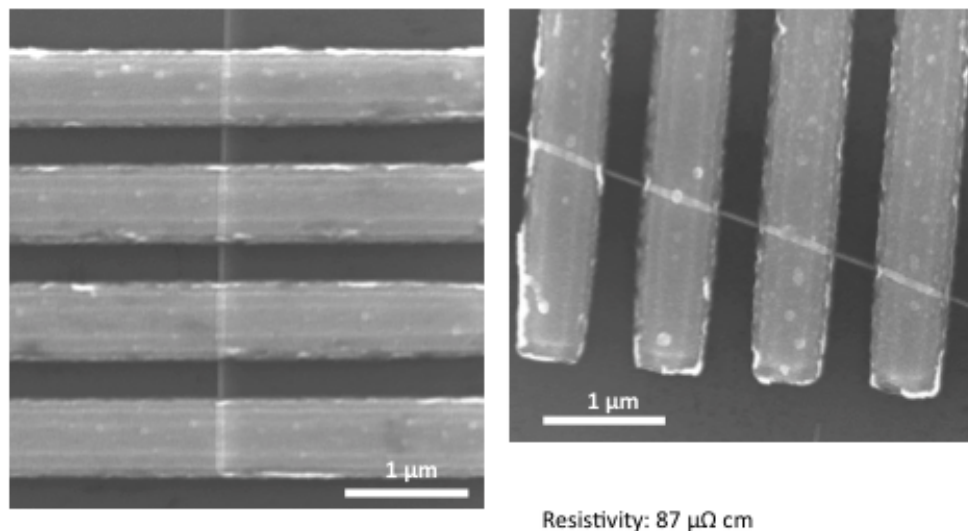

**Figure S2.** Electrical characterization of the NiSi<sub>x</sub> NWs. Two different NiSi<sub>x</sub> NWs are shown above and their average resistivity, measured by a 4-probe technique is 87 μΩ.cm. For the calculation of the resistivity, we have removed 10 nm from the SEM-measured diameter of the NWs. This is to take into account the native oxide/damaged surface layer than can be seen on the TEM picture of Figure S1d.

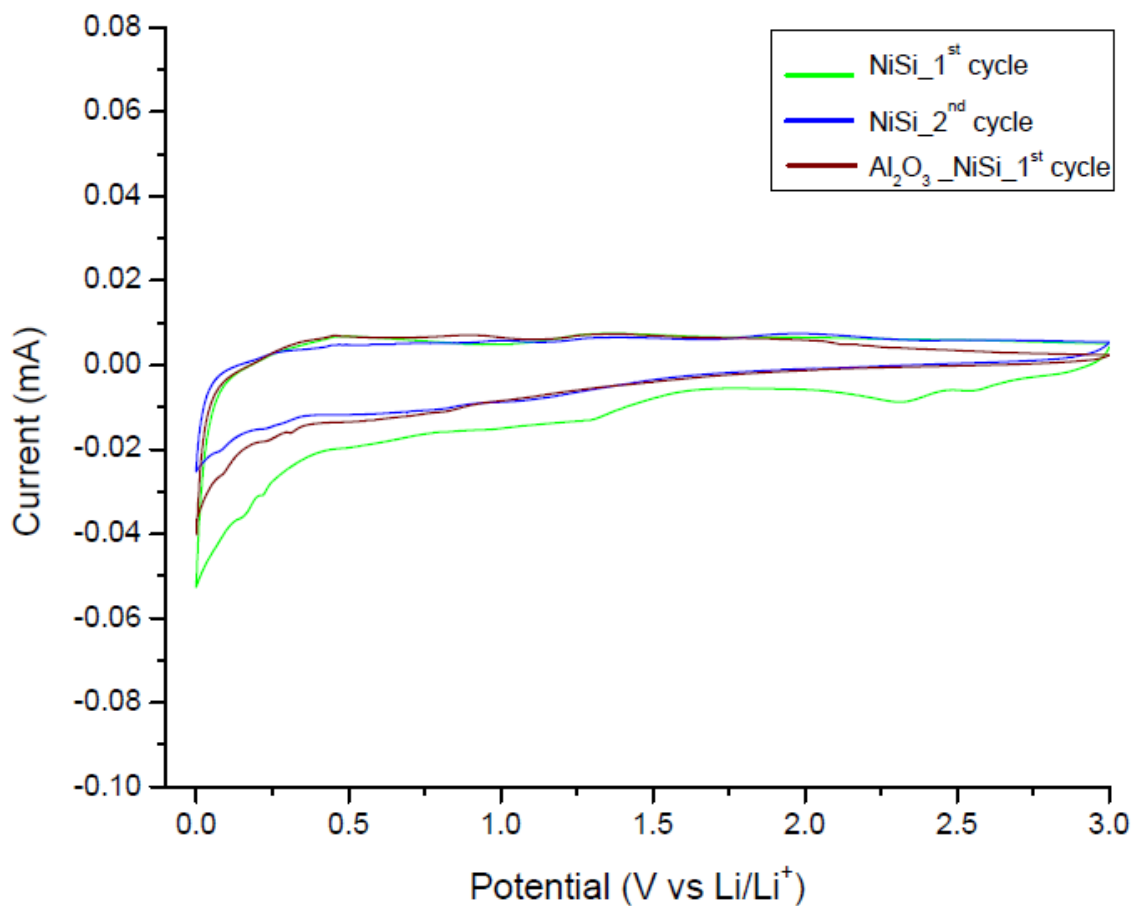

**Figure S3.** Cyclic voltammograms (scan rate: 0.05 mV/s) of bare NiSi<sub>x</sub> anodes (green and blue for respectively the first and second cycles), compared with the first cycle of Al<sub>2</sub>O<sub>3</sub>-coated NiSi<sub>x</sub> NWs (brown). Note the smaller magnitude of the current for the Al<sub>2</sub>O<sub>3</sub>-coated NiSi<sub>x</sub> NWs when the voltage approaches zero, an indication of the efficiency of the Al<sub>2</sub>O<sub>3</sub> layer to limit electrolyte decomposition.
